# Supplementary material for: miR-181a Post-Transcriptionally Downregulates Oncogenic RalA and Contributes to Growth Inhibition and Apoptosis in Chronic Myelogenous Leukemia (CML)
Source: PLoS One. 2012 Mar 19;7(3):e32834. doi: 10.1371/journal.pone.0032834 (PMC3307705; doi:10.1371/journal.pone.0032834)
Supplement: Table S1 — Human miR-181a 691 conserved targets (XLS) [file pone.0032834.s001.xls]

## Sheet: Sheet1
Target gene
	Gene name
TNPO1	transportin 1
KIAA0528	KIAA0528
FIGN	fidgetin
RP11-130N24.1	KIAA2022 protein
PAPD5	PAP associated domain containing 5
GOLGA8E	golgi autoantigen, golgin subfamily a, 8E
GOLGA8G	golgi autoantigen, golgin subfamily a, 8G
ACVR2B	activin A receptor, type IIB
HISPPD1	histidine acid phosphatase domain containing 1
GLS	glutaminase
KIAA0195	KIAA0195
LOC153222	adult retina protein
CTDSPL	CTD (carboxy-terminal domain, RNA polymerase II, polypeptide A) small phosphatase-like
DDX3X	DEAD (Asp-Glu-Ala-Asp) box polypeptide 3, X-linked
MPP5	membrane protein, palmitoylated 5 (MAGUK p55 subfamily member 5)
KIAA1553	KIAA1553
TOM1L1	target of myb1 (chicken)-like 1
CENTB2	centaurin, beta 2
ST8SIA4	ST8 alpha-N-acetyl-neuraminide alpha-2,8-sialyltransferase 4
GPD1L	glycerol-3-phosphate dehydrogenase 1-like
ONECUT2	one cut domain, family member 2
HOXC8	homeobox C8
EDG1	endothelial differentiation, sphingolipid G-protein-coupled receptor, 1
TIMP3	TIMP metallopeptidase inhibitor 3 (Sorsby fundus dystrophy, pseudoinflammatory)
ARSJ	arylsulfatase family, member J
ZNF468	zinc finger protein 468
SIPA1L2	signal-induced proliferation-associated 1 like 2
ITSN1	intersectin 1 (SH3 domain protein)
LARP4	La ribonucleoprotein domain family, member 4
UBP1	upstream binding protein 1 (LBP-1a)
CBX7	chromobox homolog 7
METAP1	methionyl aminopeptidase 1
GPD2	glycerol-3-phosphate dehydrogenase 2 (mitochondrial)
RLF	rearranged L-myc fusion
CDON	Cdon homolog (mouse)
AP1G1	adaptor-related protein complex 1, gamma 1 subunit
CLIP1	CAP-GLY domain containing linker protein 1
ATP2B2	ATPase, Ca++ transporting, plasma membrane 2
SPRY4	sprouty homolog 4 (Drosophila)
NOVA1	neuro-oncological ventral antigen 1
RPS6KB1	ribosomal protein S6 kinase, 70kDa, polypeptide 1
MTMR12	myotubularin related protein 12
ATP2B1	ATPase, Ca++ transporting, plasma membrane 1
BTBD3	BTB (POZ) domain containing 3
FLJ38973	hypothetical protein FLJ38973
FOXP1	forkhead box P1
PLAG1	pleiomorphic adenoma gene 1
CLASP1	cytoplasmic linker associated protein 1
CPEB4	cytoplasmic polyadenylation element binding protein 4
SLC25A37	solute carrier family 25, member 37
NFAT5	nuclear factor of activated T-cells 5, tonicity-responsive
GHITM	growth hormone inducible transmembrane protein
TCERG1	transcription elongation regulator 1
SLITRK1	SLIT and NTRK-like family, member 1
PHF20L1	PHD finger protein 20-like 1
PHTF2	putative homeodomain transcription factor 2
ITGB8	integrin, beta 8
ABI3BP	ABI gene family, member 3 (NESH) binding protein
BIRC6	baculoviral IAP repeat-containing 6 (apollon)
ZFP36L1	zinc finger protein 36, C3H type-like 1
SYNPR	synaptoporin
TBC1D1	TBC1 (tre-2/USP6, BUB2, cdc16) domain family, member 1
LIN28B	lin-28 homolog B (C. elegans)
SSX2IP	synovial sarcoma, X breakpoint 2 interacting protein
C10orf22	chromosome 10 open reading frame 22
YTHDC1	YTH domain containing 1
PNRC2	proline-rich nuclear receptor coactivator 2
KLHL5	kelch-like 5 (Drosophila)
CREBZF	CREB/ATF bZIP transcription factor
HEY2	hairy/enhancer-of-split related with YRPW motif 2
C14orf129	chromosome 14 open reading frame 129
MAP7D2	MAP7 domain containing 2
TGFBR1	transforming growth factor, beta receptor I (activin A receptor type II-like kinase, 53kDa)
RNF6	ring finger protein (C3H2C3 type) 6
ACVR2A	activin A receptor, type IIA
RNF34	ring finger protein 34
GABRA1	gamma-aminobutyric acid (GABA) A receptor, alpha 1
PRTG	protogenin homolog (Gallus gallus)
BHLHB2	basic helix-loop-helix domain containing, class B, 2
PALM2	paralemmin 2
OSBPL8	oxysterol binding protein-like 8
SRPK2	SFRS protein kinase 2
C3orf59	chromosome 3 open reading frame 59
LIN28	lin-28 homolog (C. elegans)
ZIC3	Zic family member 3 heterotaxy 1 (odd-paired homolog, Drosophila)
RBM25	RNA binding motif protein 25
DERL1	Der1-like domain family, member 1
SLC2A3	solute carrier family 2 (facilitated glucose transporter), member 3
PPP1R12B	protein phosphatase 1, regulatory (inhibitor) subunit 12B
KIAA1219	KIAA1219
DCUN1D1	DCN1, defective in cullin neddylation 1, domain containing 1 (S. cerevisiae)
FNDC3B	fibronectin type III domain containing 3B
ARHGEF7	Rho guanine nucleotide exchange factor (GEF) 7
ANKRD13C	ankyrin repeat domain 13C
LOC388272	similar to RIKEN cDNA 4921524J17
PCNP	PEST proteolytic signal containing nuclear protein
DNAJC13	DnaJ (Hsp40) homolog, subfamily C, member 13
ETV6	ets variant gene 6 (TEL oncogene)
GRM5	glutamate receptor, metabotropic 5
MAMDC2	MAM domain containing 2
PKNOX2	PBX/knotted 1 homeobox 2
KIAA0182	KIAA0182
HSP90B1	heat shock protein 90kDa beta (Grp94), member 1
NR3C1	nuclear receptor subfamily 3, group C, member 1 (glucocorticoid receptor)
IGF2BP2	insulin-like growth factor 2 mRNA binding protein 2
PIK3R3	phosphoinositide-3-kinase, regulatory subunit 3 (p55, gamma)
PI4K2B	phosphatidylinositol 4-kinase type 2 beta
FBXO33	F-box protein 33
SFRS7	splicing factor, arginine/serine-rich 7, 35kDa
EPC2	enhancer of polycomb homolog 2 (Drosophila)
AAK1	AP2 associated kinase 1
TBC1D4	TBC1 domain family, member 4
MAPK1	mitogen-activated protein kinase 1
ADAM11	ADAM metallopeptidase domain 11
SPECC1L	SPECC1-like
PCDHAC1	protocadherin alpha subfamily C, 1
PCDHAC2	protocadherin alpha subfamily C, 2
PCDHA1	protocadherin alpha 1
PCDHA10	protocadherin alpha 10
PCDHA12	protocadherin alpha 12
PCDHA13	protocadherin alpha 13
PCDHA2	protocadherin alpha 2
PCDHA3	protocadherin alpha 3
PCDHA4	protocadherin alpha 4
PCDHA5	protocadherin alpha 5
PCDHA6	protocadherin alpha 6
PCDHA7	protocadherin alpha 7
PCDHA8	protocadherin alpha 8
TNFRSF11B	tumor necrosis factor receptor superfamily, member 11b (osteoprotegerin)
C7orf41	chromosome 7 open reading frame 41
KLHL2	kelch-like 2, Mayven (Drosophila)
CTTNBP2NL	CTTNBP2 N-terminal like
TCBA1	T-cell lymphoma breakpoint associated target 1
FLJ20160	FLJ20160 protein
CPNE2	copine II
ZFAND6	zinc finger, AN1-type domain 6
RASSF1	Ras association (RalGDS/AF-6) domain family 1
RPS6KA3	ribosomal protein S6 kinase, 90kDa, polypeptide 3
ADAMTS5	ADAM metallopeptidase with thrombospondin type 1 motif, 5 (aggrecanase-2)
MBOAT2	membrane bound O-acyltransferase domain containing 2
DEK	DEK oncogene (DNA binding)
ATG5	ATG5 autophagy related 5 homolog (S. cerevisiae)
IL1A	interleukin 1, alpha
KIF3B	kinesin family member 3B
FMNL2	formin-like 2
PLCL2	phospholipase C-like 2
BAZ2B	bromodomain adjacent to zinc finger domain, 2B
CBX4	chromobox homolog 4 (Pc class homolog, Drosophila)
NCOA2	nuclear receptor coactivator 2
GATA6	GATA binding protein 6
DLGAP2	discs, large (Drosophila) homolog-associated protein 2
KLF15	Kruppel-like factor 15
PROX1	prospero-related homeobox 1
PRKCD	protein kinase C, delta
OTUD4	OTU domain containing 4
ADAMTS18	ADAM metallopeptidase with thrombospondin type 1 motif, 18
USP33	ubiquitin specific peptidase 33
ZNF800	zinc finger protein 800
ZNF664	zinc finger protein 664
PERQ1	PERQ amino acid rich, with GYF domain 1
BRWD1	bromodomain and WD repeat domain containing 1
WDR40B	WD repeat domain 40B
PAM	peptidylglycine alpha-amidating monooxygenase
CNTN4	contactin 4
CDYL	chromodomain protein, Y-like
RABGEF1	RAB guanine nucleotide exchange factor (GEF) 1
SOX6	SRY (sex determining region Y)-box 6
USP42	ubiquitin specific peptidase 42
DCBLD2	discoidin, CUB and LCCL domain containing 2
ADARB1	adenosine deaminase, RNA-specific, B1 (RED1 homolog rat)
SAMHD1	SAM domain and HD domain 1
ZBTB4	zinc finger and BTB domain containing 4
C6orf35	chromosome 6 open reading frame 35
TXNDC12	thioredoxin domain containing 12 (endoplasmic reticulum)
MIER3	mesoderm induction early response 1, family member 3
PPFIA1	protein tyrosine phosphatase, receptor type, f polypeptide (PTPRF), interacting protein (liprin), alpha 1
DYNC1LI2	dynein, cytoplasmic 1, light intermediate chain 2
FLJ20273	RNA-binding protein
RBBP7	retinoblastoma binding protein 7
MAP2K1	mitogen-activated protein kinase kinase 1
GOLGA8A	golgi autoantigen, golgin subfamily a, 8A
BCLAF1	BCL2-associated transcription factor 1
NRXN1	neurexin 1
CALM1	calmodulin 1 (phosphorylase kinase, delta)
GOLGA8B	golgi autoantigen, golgin subfamily a, 8B
ZDHHC17	zinc finger, DHHC-type containing 17
SS18L1	synovial sarcoma translocation gene on chromosome 18-like 1
DHX57	DEAH (Asp-Glu-Ala-Asp/His) box polypeptide 57
LMBRD2	LMBR1 domain containing 2
ZNF536	zinc finger protein 536
B4GALT1	UDP-Gal:betaGlcNAc beta 1,4- galactosyltransferase, polypeptide 1
TRIM71	tripartite motif-containing 71
MLL3	myeloid/lymphoid or mixed-lineage leukemia 3
CDC73	cell division cycle 73, Paf1/RNA polymerase II complex component, homolog (S. cerevisiae)
FAM3C	family with sequence similarity 3, member C
NCALD	neurocalcin delta
SEMA4G	sema domain, immunoglobulin domain (Ig), transmembrane domain (TM) and short cytoplasmic domain, (semaphorin) 4G
FKBP1A	FK506 binding protein 1A, 12kDa
NR4A3	nuclear receptor subfamily 4, group A, member 3
ADCY1	adenylate cyclase 1 (brain)
C5orf5	chromosome 5 open reading frame 5
PDGFRA	platelet-derived growth factor receptor, alpha polypeptide
HIC2	hypermethylated in cancer 2
DMXL2	Dmx-like 2
LYCAT	lysocardiolipin acyltransferase
DOCK10	dedicator of cytokinesis 10
NPTXR	neuronal pentraxin receptor
LBR	lamin B receptor
HOXA11	homeobox A11
GREM1	gremlin 1, cysteine knot superfamily, homolog (Xenopus laevis)
NR6A1	nuclear receptor subfamily 6, group A, member 1
CCNK	cyclin K
HOXA1	homeobox A1
CCNJ	cyclin J
WSB1	WD repeat and SOCS box-containing 1
CNTNAP2	contactin associated protein-like 2
BMP3	bone morphogenetic protein 3 (osteogenic)
FLJ31951	hypothetical protein FLJ31951
NR2C2	nuclear receptor subfamily 2, group C, member 2
MAP3K7IP2	mitogen-activated protein kinase kinase kinase 7 interacting protein 2
CBLB	Cas-Br-M (murine) ecotropic retroviral transforming sequence b
CBFA2T3	core-binding factor, runt domain, alpha subunit 2; translocated to, 3
LRBA	LPS-responsive vesicle trafficking, beach and anchor containing
RAN	RAN, member RAS oncogene family
C14orf43	chromosome 14 open reading frame 43
ADCY9	adenylate cyclase 9
PPARA	peroxisome proliferator-activated receptor alpha
C11orf30	chromosome 11 open reading frame 30
ZNF302	zinc finger protein 302
SOX5	SRY (sex determining region Y)-box 5
UBE2B	ubiquitin-conjugating enzyme E2B (RAD6 homolog)
SEC24C	SEC24 related gene family, member C (S. cerevisiae)
JAZF1	JAZF zinc finger 1
ANKRD43	ankyrin repeat domain 43
ETS1	v-ets erythroblastosis virus E26 oncogene homolog 1 (avian)
PUM1	pumilio homolog 1 (Drosophila)
NPEPPS	aminopeptidase puromycin sensitive
TMEM16A	transmembrane protein 16A
ATP11C	ATPase, Class VI, type 11C
RNMT	RNA (guanine-7-) methyltransferase
PCTK2	PCTAIRE protein kinase 2
PTPN9	protein tyrosine phosphatase, non-receptor type 9
GAPVD1	GTPase activating protein and VPS9 domains 1
PRKAG2	protein kinase, AMP-activated, gamma 2 non-catalytic subunit
KPNB1	karyopherin (importin) beta 1
TSC22D2	TSC22 domain family, member 2
GRB10	growth factor receptor-bound protein 10
YOD1	YOD1 OTU deubiquinating enzyme 1 homolog (S. cerevisiae)
ERG	v-ets erythroblastosis virus E26 oncogene homolog (avian)
DAZAP2	DAZ associated protein 2
C17orf39	chromosome 17 open reading frame 39
KIAA0423	KIAA0423
ROD1	ROD1 regulator of differentiation 1 (S. pombe)
RAP1B	RAP1B, member of RAS oncogene family
RNF182	ring finger protein 182
CDC42BPA	CDC42 binding protein kinase alpha (DMPK-like)
POM121	POM121 membrane glycoprotein (rat)
LRRC32	leucine rich repeat containing 32
BRD1	bromodomain containing 1
ANKRD50	ankyrin repeat domain 50
ETNK1	ethanolamine kinase 1
SPIRE1	spire homolog 1 (Drosophila)
ANKRD15	ankyrin repeat domain 15
TMEM113	transmembrane protein 113
BAIAP2	BAI1-associated protein 2
ABTB2	ankyrin repeat and BTB (POZ) domain containing 2
FAM19A2	family with sequence similarity 19 (chemokine (C-C motif)-like), member A2
NFIB	nuclear factor I/B
SACM1L	SAC1 suppressor of actin mutations 1-like (yeast)
LEMD3	LEM domain containing 3
TNFSF11	tumor necrosis factor (ligand) superfamily, member 11
BCL2L11	BCL2-like 11 (apoptosis facilitator)
GOLGA1	golgi autoantigen, golgin subfamily a, 1
PHLDA1	pleckstrin homology-like domain, family A, member 1
ZC3H6	zinc finger CCCH-type containing 6
UNC5A	unc-5 homolog A (C. elegans)
SLMAP	sarcolemma associated protein
TRPM3	transient receptor potential cation channel, subfamily M, member 3
TMEFF1	transmembrane protein with EGF-like and two follistatin-like domains 1
USP15	ubiquitin specific peptidase 15
LOC158381	hypothetical protein LOC158381
NEGR1	neuronal growth regulator 1
QKI	quaking homolog, KH domain RNA binding (mouse)
CD69	CD69 molecule
CDKN2AIP	CDKN2A interacting protein
COL16A1	collagen, type XVI, alpha 1
TBL1X	transducin (beta)-like 1X-linked
MYBL1	v-myb myeloblastosis viral oncogene homolog (avian)-like 1
EIF4A2	eukaryotic translation initiation factor 4A, isoform 2
BCL2	B-cell CLL/lymphoma 2
HRB	HIV-1 Rev binding protein
IGSF11	immunoglobulin superfamily, member 11
SYNE1	spectrin repeat containing, nuclear envelope 1
MBNL2	muscleblind-like 2 (Drosophila)
ARNT2	aryl-hydrocarbon receptor nuclear translocator 2
C6orf62	chromosome 6 open reading frame 62
FAM122B	family with sequence similarity 122B
LIF	leukemia inhibitory factor (cholinergic differentiation factor)
IMPG1	interphotoreceptor matrix proteoglycan 1
ZIC2	Zic family member 2 (odd-paired homolog, Drosophila)
IRS2	insulin receptor substrate 2
C11orf56	chromosome 11 open reading frame 56
DKFZP686A01247	hypothetical protein
THRB	thyroid hormone receptor, beta (erythroblastic leukemia viral (v-erb-a) oncogene homolog 2, avian)
TGFBI	transforming growth factor, beta-induced, 68kDa
EN2	engrailed homeobox 2
RAD21	RAD21 homolog (S. pombe)
CSNK1G1	casein kinase 1, gamma 1
PDCD4	programmed cell death 4 (neoplastic transformation inhibitor)
SERTAD2	SERTA domain containing 2
ATP8B1	ATPase, Class I, type 8B, member 1
PRICKLE2	prickle homolog 2 (Drosophila)
UBL3	ubiquitin-like 3
FLJ32679	golgin-like hypothetical protein LOC440321
ENAH	enabled homolog (Drosophila)
PBX3	pre-B-cell leukemia homeobox 3
RSPO2	R-spondin 2 homolog (Xenopus laevis)
SIRT1	sirtuin (silent mating type information regulation 2 homolog) 1 (S. cerevisiae)
TMCC1	transmembrane and coiled-coil domain family 1
BAI3	brain-specific angiogenesis inhibitor 3
SCOC	short coiled-coil protein
KPNA1	karyopherin alpha 1 (importin alpha 5)
AKAP6	A kinase (PRKA) anchor protein 6
PAWR	PRKC, apoptosis, WT1, regulator
TBL1XR1	transducin (beta)-like 1X-linked receptor 1
RIN2	Ras and Rab interactor 2
PURB	purine-rich element binding protein B
LMO3	LIM domain only 3 (rhombotin-like 2)
CNTNAP3	contactin associated protein-like 3
MSI2	musashi homolog 2 (Drosophila)
G3BP2	GTPase activating protein (SH3 domain) binding protein 2
CRSP7	cofactor required for Sp1 transcriptional activation, subunit 7, 70kDa
NAT13	N-acetyltransferase 13
ADAMTS19	ADAM metallopeptidase with thrombospondin type 1 motif, 19
CARD11	caspase recruitment domain family, member 11
CNNM2	cyclin M2
ACSL1	acyl-CoA synthetase long-chain family member 1
RANBP5	RAN binding protein 5
CNOT6L	CCR4-NOT transcription complex, subunit 6-like
ARFGEF2	ADP-ribosylation factor guanine nucleotide-exchange factor 2 (brefeldin A-inhibited)
CD2AP	CD2-associated protein
ADRBK1	adrenergic, beta, receptor kinase 1
CHIC1	cysteine-rich hydrophobic domain 1
KIAA1128	KIAA1128
MECP2	methyl CpG binding protein 2 (Rett syndrome)
RBM26	RNA binding motif protein 26
PSPC1	paraspeckle component 1
DNAJA5	DnaJ homology subfamily A member 5
FAM80B	family with sequence similarity 80, member B
EED	embryonic ectoderm development
DOCK4	dedicator of cytokinesis 4
PLEKHJ1	pleckstrin homology domain containing, family J member 1
YTHDF3	YTH domain family, member 3
FAM126B	family with sequence similarity 126, member B
ADAMTS6	ADAM metallopeptidase with thrombospondin type 1 motif, 6
CRIM1	cysteine rich transmembrane BMP regulator 1 (chordin-like)
LRRN1	leucine rich repeat neuronal 1
E2F7	E2F transcription factor 7
PCAF	p300/CBP-associated factor
PLEKHA3	pleckstrin homology domain containing, family A (phosphoinositide binding specific) member 3
SENP1	SUMO1/sentrin specific peptidase 1
HECA	headcase homolog (Drosophila)
TBPL1	TBP-like 1
BACH2	BTB and CNC homology 1, basic leucine zipper transcription factor 2
EPHA4	EPH receptor A4
MAP1B	microtubule-associated protein 1B
ATXN1	ataxin 1
AFTPH	aftiphilin
PHF15	PHD finger protein 15
PODXL	podocalyxin-like
AYTL2	acyltransferase like 2
PPM1B	protein phosphatase 1B (formerly 2C), magnesium-dependent, beta isoform
MAP3K3	mitogen-activated protein kinase kinase kinase 3
CCAR1	cell division cycle and apoptosis regulator 1
BMPR2	bone morphogenetic protein receptor, type II (serine/threonine kinase)
DPP10	dipeptidyl-peptidase 10
FOXK1	forkhead box K1
MAP3K7IP3	mitogen-activated protein kinase kinase kinase 7 interacting protein 3
KLF6	Kruppel-like factor 6
CUL3	cullin 3
NIPBL	Nipped-B homolog (Drosophila)
MBOAT1	membrane bound O-acyltransferase domain containing 1
LOC440742	hypothetical gene supported by AK124614
DIP2B	DIP2 disco-interacting protein 2 homolog B (Drosophila)
UBE3C	ubiquitin protein ligase E3C
RECK	reversion-inducing-cysteine-rich protein with kazal motifs
HLF	hepatic leukemia factor
NARG1	NMDA receptor regulated 1
SLC25A25	solute carrier family 25 (mitochondrial carrier; phosphate carrier), member 25
ZDHHC7	zinc finger, DHHC-type containing 7
ILF3	interleukin enhancer binding factor 3, 90kDa
PER2	period homolog 2 (Drosophila)
CUL5	cullin 5
CPD	carboxypeptidase D
EPB41L4B	erythrocyte membrane protein band 4.1 like 4B
SLITRK2	SLIT and NTRK-like family, member 2
LPP	LIM domain containing preferred translocation partner in lipoma
ITGA3	integrin, alpha 3 (antigen CD49C, alpha 3 subunit of VLA-3 receptor)
CNR1	cannabinoid receptor 1 (brain)
CYR61	cysteine-rich, angiogenic inducer, 61
ARL5A	ADP-ribosylation factor-like 5A
CD4	CD4 molecule
CDKL2	cyclin-dependent kinase-like 2 (CDC2-related kinase)
DPYSL2	dihydropyrimidinase-like 2
TEAD1	TEA domain family member 1 (SV40 transcriptional enhancer factor)
ABI1	abl-interactor 1
GALNTL1	UDP-N-acetyl-alpha-D-galactosamine:polypeptide N-acetylgalactosaminyltransferase-like 1
ATP1B1	ATPase, Na+/K+ transporting, beta 1 polypeptide
HMGB2	high-mobility group box 2
SCHIP1	schwannomin interacting protein 1
GPBP1	GC-rich promoter binding protein 1
FRYL	FRY-like
SYPL1	synaptophysin-like 1
PAFAH1B1	platelet-activating factor acetylhydrolase, isoform Ib, alpha subunit 45kDa
STC1	stanniocalcin 1
AKT3	v-akt murine thymoma viral oncogene homolog 3 (protein kinase B, gamma)
CHD9	chromodomain helicase DNA binding protein 9
MTMR9	myotubularin related protein 9
CARM1	coactivator-associated arginine methyltransferase 1
INPP5E	inositol polyphosphate-5-phosphatase, 72 kDa
FAM73B	family with sequence similarity 73, member B
SEC24A	SEC24 related gene family, member A (S. cerevisiae)
DOCK7	dedicator of cytokinesis 7
DNAJA3	DnaJ (Hsp40) homolog, subfamily A, member 3
INOC1	INO80 complex homolog 1 (S. cerevisiae)
ZNF697	zinc finger protein 697
ELAVL2	ELAV (embryonic lethal, abnormal vision, Drosophila)-like 2 (Hu antigen B)
SMAD7	SMAD family member 7
PPP3R1	protein phosphatase 3 (formerly 2B), regulatory subunit B, alpha isoform
YWHAG	tyrosine 3-monooxygenase/tryptophan 5-monooxygenase activation protein, gamma polypeptide
ESR1	estrogen receptor 1
CGGBP1	CGG triplet repeat binding protein 1
GLIS3	GLIS family zinc finger 3
RAB11A	RAB11A, member RAS oncogene family
DUSP6	dual specificity phosphatase 6
RALA	v-ral simian leukemia viral oncogene homolog A (ras related)
PLS1	plastin 1 (I isoform)
LONRF1	LON peptidase N-terminal domain and ring finger 1
C10orf6	chromosome 10 open reading frame 6
BMPER	BMP binding endothelial regulator
LRP12	low density lipoprotein-related protein 12
ATP2A2	ATPase, Ca++ transporting, cardiac muscle, slow twitch 2
FNDC3A	fibronectin type III domain containing 3A
PHOX2B	paired-like homeobox 2b
BCL11A	B-cell CLL/lymphoma 11A (zinc finger protein)
PTEN	phosphatase and tensin homolog (mutated in multiple advanced cancers 1)
TOX	thymocyte selection-associated high mobility group box
HCN2	hyperpolarization activated cyclic nucleotide-gated potassium channel 2
NMT2	N-myristoyltransferase 2
HEXIM1	hexamethylene bis-acetamide inducible 1
PAPOLG	poly(A) polymerase gamma
EN1	engrailed homeobox 1
KCNK10	potassium channel, subfamily K, member 10
CDH13	cadherin 13, H-cadherin (heart)
KCNMA1	potassium large conductance calcium-activated channel, subfamily M, alpha member 1
MTPN	myotrophin
CTTNBP2	cortactin binding protein 2
PRIMA1	proline rich membrane anchor 1
CDX2	caudal type homeobox transcription factor 2
SLC38A2	solute carrier family 38, member 2
PRKCE	protein kinase C, epsilon
PDIA6	protein disulfide isomerase family A, member 6
PICALM	phosphatidylinositol binding clathrin assembly protein
C4orf16	chromosome 4 open reading frame 16
MYCBP2	MYC binding protein 2
CCDC6	coiled-coil domain containing 6
IQSEC2	IQ motif and Sec7 domain 2
ZNF207	zinc finger protein 207
TM9SF3	transmembrane 9 superfamily member 3
TARDBP	TAR DNA binding protein
LMO1	LIM domain only 1 (rhombotin 1)
DUSP5	dual specificity phosphatase 5
CIT	citron (rho-interacting, serine/threonine kinase 21)
C10orf78	chromosome 10 open reading frame 78
CSNK1G3	casein kinase 1, gamma 3
RORB	RAR-related orphan receptor B
CAMTA2	calmodulin binding transcription activator 2
KIAA0802	KIAA0802
LUZP1	leucine zipper protein 1
OGT	O-linked N-acetylglucosamine (GlcNAc) transferase (UDP-N-acetylglucosamine:polypeptide-N-acetylglucosaminyl transferase)
MGAT2	mannosyl (alpha-1,6-)-glycoprotein beta-1,2-N-acetylglucosaminyltransferase
MTMR7	myotubularin related protein 7
S100PBP	S100P binding protein
CD163	CD163 molecule
DKFZp667G2110	hypothetical protein DKFZp667G2110
SIX4	sine oculis homeobox homolog 4 (Drosophila)
PAK7	p21(CDKN1A)-activated kinase 7
RUNX1	runt-related transcription factor 1 (acute myeloid leukemia 1; aml1 oncogene)
TULP4	tubby like protein 4
BNC2	basonuclin 2
TMEM9B	TMEM9 domain family, member B
MAT2A	methionine adenosyltransferase II, alpha
MARCKS	myristoylated alanine-rich protein kinase C substrate
LOC129607	hypothetical protein LOC129607
NSMAF	neutral sphingomyelinase (N-SMase) activation associated factor
TRAK2	trafficking protein, kinesin binding 2
NAB1	NGFI-A binding protein 1 (EGR1 binding protein 1)
NLK	nemo-like kinase
SHROOM3	shroom family member 3
DUSP10	dual specificity phosphatase 10
ZCCHC3	zinc finger, CCHC domain containing 3
SLC9A6	solute carrier family 9 (sodium/hydrogen exchanger), member 6
ZNF615	zinc finger protein 615
FLT1	fms-related tyrosine kinase 1 (vascular endothelial growth factor/vascular permeability factor receptor)
HYOU1	hypoxia up-regulated 1
CACNB2	calcium channel, voltage-dependent, beta 2 subunit
TNP1	transition protein 1 (during histone to protamine replacement)
ZFHX4	zinc finger homeodomain 4
KIAA1217	KIAA1217
YTHDF2	YTH domain family, member 2
MIP	major intrinsic protein of lens fiber
CHD7	chromodomain helicase DNA binding protein 7
ETF1	eukaryotic translation termination factor 1
RTF1	Rtf1, Paf1/RNA polymerase II complex component, homolog (S. cerevisiae)
GMFB	glia maturation factor, beta
MAPT	microtubule-associated protein tau
PALLD	palladin, cytoskeletal associated protein
RKHD3	ring finger and KH domain containing 3
GRIA2	glutamate receptor, ionotropic, AMPA 2
GLCCI1	glucocorticoid induced transcript 1
SMAP1	stromal membrane-associated protein 1
ZC3H11A	zinc finger CCCH-type containing 11A
NPTN	neuroplastin
SEL1L	sel-1 suppressor of lin-12-like (C. elegans)
BCL6	B-cell CLL/lymphoma 6 (zinc finger protein 51)
TMED5	transmembrane emp24 protein transport domain containing 5
NOG	noggin
DOPEY1	dopey family member 1
HPS3	Hermansky-Pudlak syndrome 3
MITF	microphthalmia-associated transcription factor
EPS15	epidermal growth factor receptor pathway substrate 15
GNAO1	guanine nucleotide binding protein (G protein), alpha activating activity polypeptide O
2009-09-03	septin 3
ELOVL2	elongation of very long chain fatty acids (FEN1/Elo2, SUR4/Elo3, yeast)-like 2
CAMK2G	calcium/calmodulin-dependent protein kinase (CaM kinase) II gamma
GRIK2	glutamate receptor, ionotropic, kainate 2
SNN	stannin
QSER1	glutamine and serine rich 1
PDHX	pyruvate dehydrogenase complex, component X
SIX2	sine oculis homeobox homolog 2 (Drosophila)
GRM7	glutamate receptor, metabotropic 7
SENP2	SUMO1/sentrin/SMT3 specific peptidase 2
MAP1A	microtubule-associated protein 1A
GNAI1	guanine nucleotide binding protein (G protein), alpha inhibiting activity polypeptide 1
KIAA0789	KIAA0789 gene product
ANKFY1	ankyrin repeat and FYVE domain containing 1
CNOT2	CCR4-NOT transcription complex, subunit 2
PHF3	PHD finger protein 3
RAI1	retinoic acid induced 1
YY1	YY1 transcription factor
CAMSAP1	calmodulin regulated spectrin-associated protein 1
CBFA2T2	core-binding factor, runt domain, alpha subunit 2; translocated to, 2
MAP3K10	mitogen-activated protein kinase kinase kinase 10
C14orf4	chromosome 14 open reading frame 4
DLG2	discs, large homolog 2, chapsyn-110 (Drosophila)
HSPA5	heat shock 70kDa protein 5 (glucose-regulated protein, 78kDa)
INPP5A	inositol polyphosphate-5-phosphatase, 40kDa
EPHA7	EPH receptor A7
HOXB5	homeobox B5
FOS	v-fos FBJ murine osteosarcoma viral oncogene homolog
CREB1	cAMP responsive element binding protein 1
GDPD1	glycerophosphodiester phosphodiesterase domain containing 1
PPAP2B	phosphatidic acid phosphatase type 2B
TNRC6B	trinucleotide repeat containing 6B
AFF4	AF4/FMR2 family, member 4
C1orf149	chromosome 1 open reading frame 149
NBEA	neurobeachin
BAAT	bile acid Coenzyme A: amino acid N-acyltransferase (glycine N-choloyltransferase)
ATBF1	AT-binding transcription factor 1
KBTBD8	kelch repeat and BTB (POZ) domain containing 8
STIM2	stromal interaction molecule 2
STAG1	stromal antigen 1
PKN2	protein kinase N2
GRID1	glutamate receptor, ionotropic, delta 1
GRIA3	glutamate receptor, ionotrophic, AMPA 3
ZNF25	zinc finger protein 25
C1orf34	chromosome 1 open reading frame 34
GRK6	G protein-coupled receptor kinase 6
SCML2	sex comb on midleg-like 2 (Drosophila)
FBXO11	F-box protein 11
ZFP90	zinc finger protein 90 homolog (mouse)
ZNF618	zinc finger protein 618
C16orf70	chromosome 16 open reading frame 70
LRP4	low density lipoprotein receptor-related protein 4
ADM	adrenomedullin
ROBO2	roundabout, axon guidance receptor, homolog 2 (Drosophila)
TRIM39	tripartite motif-containing 39
CSTF3	cleavage stimulation factor, 3' pre-RNA, subunit 3, 77kDa
ARL3	ADP-ribosylation factor-like 3
MINK1	misshapen-like kinase 1 (zebrafish)
AFF1	AF4/FMR2 family, member 1
ZBTB41	zinc finger and BTB domain containing 41
PDK4	pyruvate dehydrogenase kinase, isozyme 4
PAK4	p21(CDKN1A)-activated kinase 4
PSAP	prosaposin (variant Gaucher disease and variant metachromatic leukodystrophy)
SRGAP1	SLIT-ROBO Rho GTPase activating protein 1
KIAA1212	KIAA1212
TTBK1	tau tubulin kinase 1
ZIC5	Zic family member 5 (odd-paired homolog, Drosophila)
SMG7	Smg-7 homolog, nonsense mediated mRNA decay factor (C. elegans)
HOXB8	homeobox B8
ARIH2	ariadne homolog 2 (Drosophila)
LPPR4	plasticity related gene 1
BAZ2A	bromodomain adjacent to zinc finger domain, 2A
CXXC5	CXXC finger 5
BPTF	bromodomain PHD finger transcription factor
CCDC85A	coiled-coil domain containing 85A
ARRDC3	arrestin domain containing 3
NOL4	nucleolar protein 4
KIAA0664	KIAA0664
NAP1L5	nucleosome assembly protein 1-like 5
RAB11FIP2	RAB11 family interacting protein 2 (class I)
TMEM168	transmembrane protein 168
FMR1	fragile X mental retardation 1
MCL1	myeloid cell leukemia sequence 1 (BCL2-related)
EBF3	early B-cell factor 3
ZFAND5	zinc finger, AN1-type domain 5
TM9SF4	transmembrane 9 superfamily protein member 4
FAM46A	family with sequence similarity 46, member A
PCGF2	polycomb group ring finger 2
APLP2	amyloid beta (A4) precursor-like protein 2
PIAS3	protein inhibitor of activated STAT, 3
IGF2BP3	insulin-like growth factor 2 mRNA binding protein 3
AGPAT1	1-acylglycerol-3-phosphate O-acyltransferase 1 (lysophosphatidic acid acyltransferase, alpha)
MAP4K4	mitogen-activated protein kinase kinase kinase kinase 4
ARF3	ADP-ribosylation factor 3
RAB3IL1	RAB3A interacting protein (rabin3)-like 1
PPP1CB	protein phosphatase 1, catalytic subunit, beta isoform
CSNK2A2	casein kinase 2, alpha prime polypeptide
HNRPH1	heterogeneous nuclear ribonucleoprotein H1 (H)
RBM22	RNA binding motif protein 22
ADAMTS1	ADAM metallopeptidase with thrombospondin type 1 motif, 1
EPB49	erythrocyte membrane protein band 4.9 (dematin)
EGR3	early growth response 3
EGR1	early growth response 1
ERF	Ets2 repressor factor
LMX1A	LIM homeobox transcription factor 1, alpha
GPM6A	glycoprotein M6A
WDR37	WD repeat domain 37
VGLL4	vestigial like 4 (Drosophila)
HNRPK	heterogeneous nuclear ribonucleoprotein K
C1orf119	chromosome 1 open reading frame 119
PLS3	plastin 3 (T isoform)
RGMA	RGM domain family, member A
LIN7C	lin-7 homolog C (C. elegans)
ATP8B2	ATPase, Class I, type 8B, member 2
PHF2	PHD finger protein 2
MTFR1	mitochondrial fission regulator 1
MSI1	musashi homolog 1 (Drosophila)
IQGAP2	IQ motif containing GTPase activating protein 2
MMP14	matrix metallopeptidase 14 (membrane-inserted)
MKNK2	MAP kinase interacting serine/threonine kinase 2
MYH10	myosin, heavy chain 10, non-muscle
ATF7	activating transcription factor 7
SEMA4C	sema domain, immunoglobulin domain (Ig), transmembrane domain (TM) and short cytoplasmic domain, (semaphorin) 4C
BCL9	B-cell CLL/lymphoma 9
PUNC	putative neuronal cell adhesion molecule
ARID5B	AT rich interactive domain 5B (MRF1-like)
TRIM3	tripartite motif-containing 3
CACNA2D2	calcium channel, voltage-dependent, alpha 2/delta subunit 2
KIF5C	kinesin family member 5C
MGA	MAX gene associated
PI4KII	phosphatidylinositol 4-kinase type II
MAEA	macrophage erythroblast attacher
TMEM127	transmembrane protein 127
XYLT1	xylosyltransferase I
ELN	elastin (supravalvular aortic stenosis, Williams-Beuren syndrome)
SYT3	synaptotagmin III
RSBN1	round spermatid basic protein 1
FUZ	fuzzy homolog (Drosophila)
HMGB1	high-mobility group box 1
HAND2	heart and neural crest derivatives expressed 2
LOC401720	similar to fidgetin
RASL10B	RAS-like, family 10, member B
BCR	breakpoint cluster region
TRIM13	tripartite motif-containing 13
POU2F2	POU domain, class 2, transcription factor 2
SH3GLB1	SH3-domain GRB2-like endophilin B1
CCDC64	coiled-coil domain containing 64
RKHD2	ring finger and KH domain containing 2
LOC91461	hypothetical protein BC007901
MYO1C	myosin IC
ACCN2	amiloride-sensitive cation channel 2, neuronal
SP7	Sp7 transcription factor
FGFR3	fibroblast growth factor receptor 3 (achondroplasia, thanatophoric dwarfism)
CELSR3	cadherin, EGF LAG seven-pass G-type receptor 3 (flamingo homolog, Drosophila)
MTF1	metal-regulatory transcription factor 1
SYPL2	synaptophysin-like 2
PSMF1	proteasome (prosome, macropain) inhibitor subunit 1 (PI31)
